# Supplementary material for: An emissive dual-sensitized bimetallic Eu2III-bioprobe: design strategy, biological interactions, and nucleolus staining studies
Source: Royal Society of Chemistry journal article supplement (doi:10.1039/d2nj02853k), 2022-01-01
Supplement: d2nj02853k1.pdf [file d2nj02853k1.pdf]

## Electronic Supporting Information (ESI)

### **Emissive Dual-Sensitized Bimetallic Eu<sub>2</sub><sup>III</sup>-Bioprobe: Design Strategy, Biological Interactions, and Nucleoli Staining Studies**

Usha Yadav,<sup>a</sup> Madhu Verma,<sup>b</sup> Zafar Abbas,<sup>a</sup> Sri Sivakumar<sup>b</sup>, and Ashis K. Patra<sup>a\*</sup>

<sup>a</sup> *Department of Chemistry, Indian Institute of Technology Kanpur, Kanpur 208016, Uttar Pradesh, India*

<sup>b</sup> *Department of Chemical Engineering and Centre for Environmental Science and Engineering, Indian Institute of Technology Kanpur, Kanpur 208016, Uttar Pradesh, India*

| <b>Table of contents</b>                                                                                                                                                                                                                                                                                                                                                                | <b>Page No.</b> |
|-----------------------------------------------------------------------------------------------------------------------------------------------------------------------------------------------------------------------------------------------------------------------------------------------------------------------------------------------------------------------------------------|-----------------|
| <b>Figure S1:</b> <sup>1</sup> H NMR (500 MHz, Chloroform- <i>d</i> ) of [ $\mu$ -pz(tpy) <sub>2</sub> ] ligand ( <b>L</b> )                                                                                                                                                                                                                                                            | <b>3</b>        |
| <b>Figure S2:</b> <sup>13</sup> C NMR spectra (101 MHz, Chloroform- <i>d</i> ) of [ $\mu$ -pz(tpy) <sub>2</sub> ] ligand ( <b>L</b> )                                                                                                                                                                                                                                                   | <b>4</b>        |
| <b>Figure S3:</b> ESI-MS spectra of [ $\mu$ -pz(tpy) <sub>2</sub> ] ligand ( <b>L</b> )                                                                                                                                                                                                                                                                                                 | <b>4</b>        |
| <b>Figure S4:</b> FT-IR spectra of [Eu <sub>2</sub> (tta) <sub>6</sub> ( $\mu$ -pz(tpy) <sub>2</sub> )] <b>1</b> and ligand <b>L</b> recorded in solid-state                                                                                                                                                                                                                            | <b>5</b>        |
| <b>Table S1:</b> Selected FT-IR frequencies (in KBr disc) of Eu <sub>2</sub> <sup>III</sup> -bioprobe and ligand <b>L</b> respectively                                                                                                                                                                                                                                                  | <b>5</b>        |
| <b>Table S2:</b> Crystallographic data and structure refinement parameters of ligand <b>L</b>                                                                                                                                                                                                                                                                                           | <b>6</b>        |
| <b>Figure S5:</b> Absorption spectra of tta and ligand <b>L</b> along with excitation spectra of Eu <sub>2</sub> <sup>III</sup> -bioprobe <b>1</b>                                                                                                                                                                                                                                      | <b>7</b>        |
| <b>Figure S6:</b> Time-dependent variations in absorption spectra of Eu <sub>2</sub> <sup>III</sup> -bioprobe <b>1</b>                                                                                                                                                                                                                                                                  | <b>8</b>        |
| <b>Figure S7:</b> UV-Vis spectral variations in Eu <sub>2</sub> <sup>III</sup> -bioprobe <b>1</b> in different solvents                                                                                                                                                                                                                                                                 | <b>8</b>        |
| <b>Figure S8:</b> Steady-state luminescence spectra of the Eu <sub>2</sub> <sup>III</sup> -bioprobe <b>1</b>                                                                                                                                                                                                                                                                            | <b>9</b>        |
| <b>Figure S9:</b> Time-resolved luminescence spectral variations of Eu <sub>2</sub> <sup>III</sup> -bioprobe <b>1</b> in the presence of different solvents                                                                                                                                                                                                                             | <b>10</b>       |
| <b>Table S3:</b> Luminescence decay lifetime ( $\tau$ ) & rate constant ( $k$ ) of the Eu <sub>2</sub> <sup>III</sup> -bioprobe <b>1</b> in the different solvent system                                                                                                                                                                                                                | <b>10</b>       |
| <b>Figure 10. (a)</b> Absorption spectral traces of bridging ligand <b>L</b> with gradually increasing concentration of [CT-DNA] (b) Fluorescence emission spectral traces of EB-bound CT-DNA                                                                                                                                                                                           | <b>11</b>       |
| <b>Figure 11. (a)</b> The effect of the addition of bridging ligand <b>L</b> in BSA solution (b) Modified Stern-Volmer plot of $\log [(I_0 - I)/I]$ vs. $\log$ ligand <b>L</b> (c, d) Emission profile of synchronous emission spectra of BSA showing the quenching of emission after gradual addition of ligand <b>L</b> with $\Delta\lambda = 15$ nm and with $\Delta\lambda = 60$ nm | <b>12</b>       |

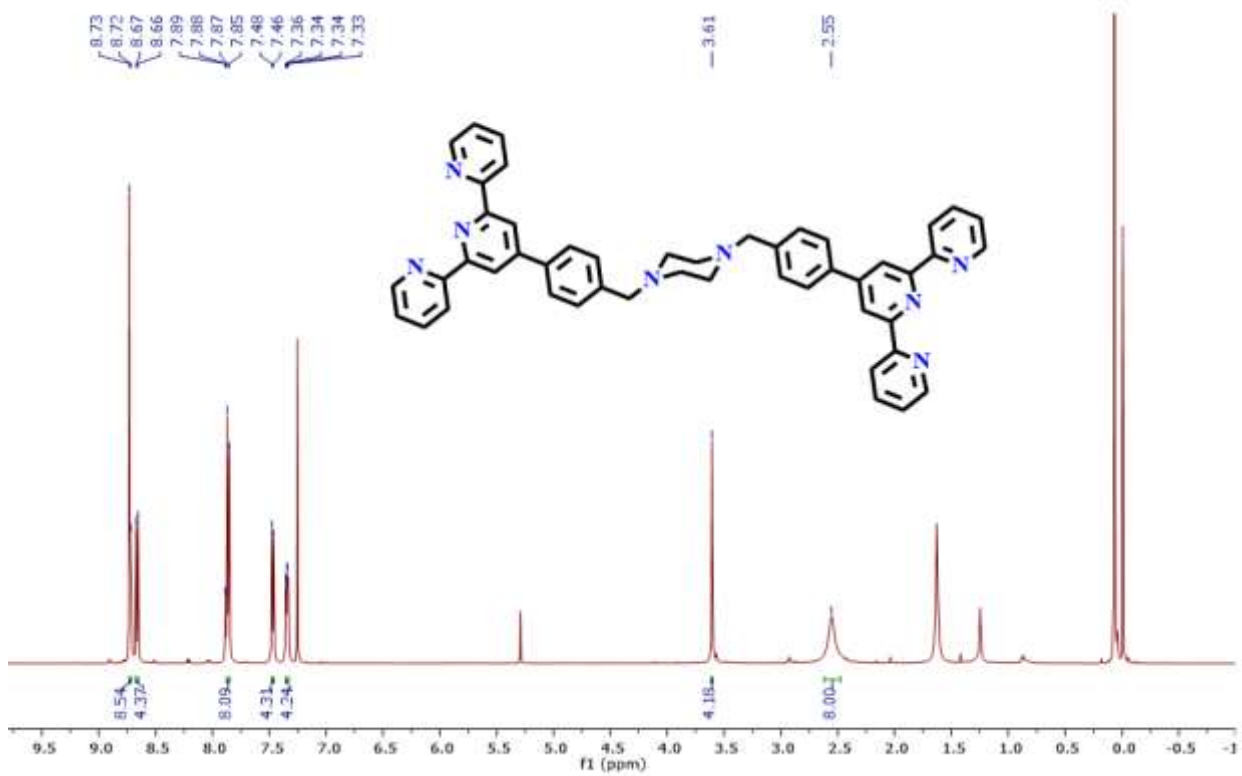

**Figure S1:** <sup>1</sup>H NMR (500 MHz, Chloroform-*d*) spectra of [μ-pz(tpy)<sub>2</sub>] (L).

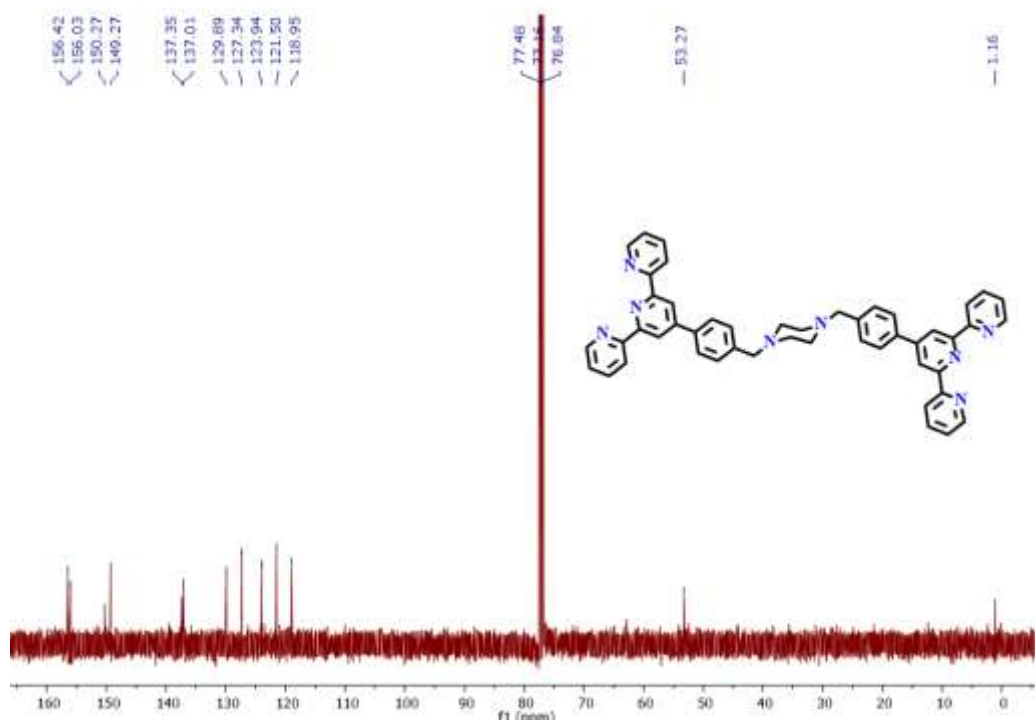

**Figure S2:**  $^{13}\text{C}$  NMR spectra (101 MHz, Chloroform-*d*) spectra of  $[\mu\text{-pz}(\text{tpy})_2] (\text{L})$ .

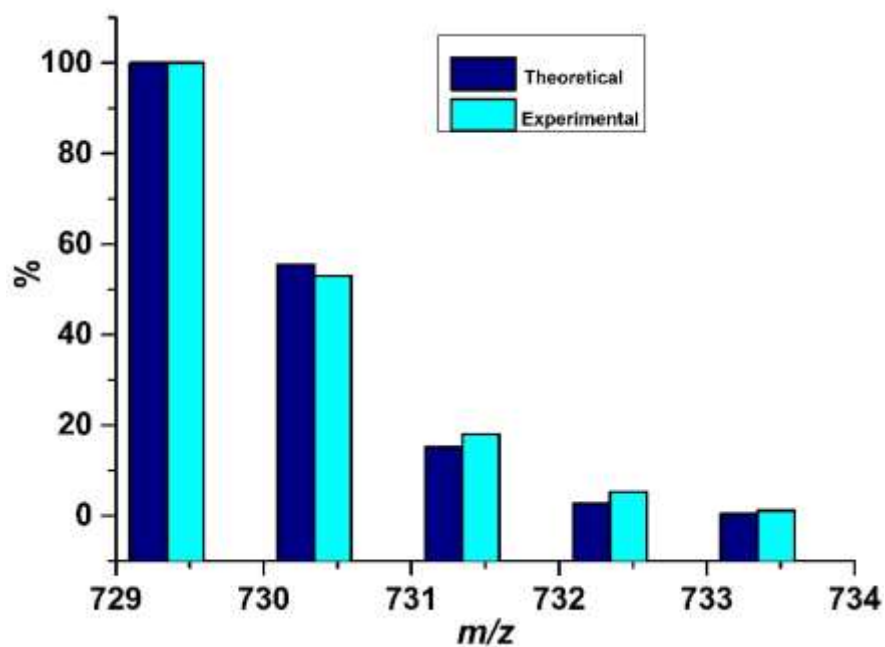

**Figure S3:** ESI-MS spectra of  $[\mu\text{-pz}(\text{tpy})_2] (\text{L})$  showing their theoretical and experimental pattern.

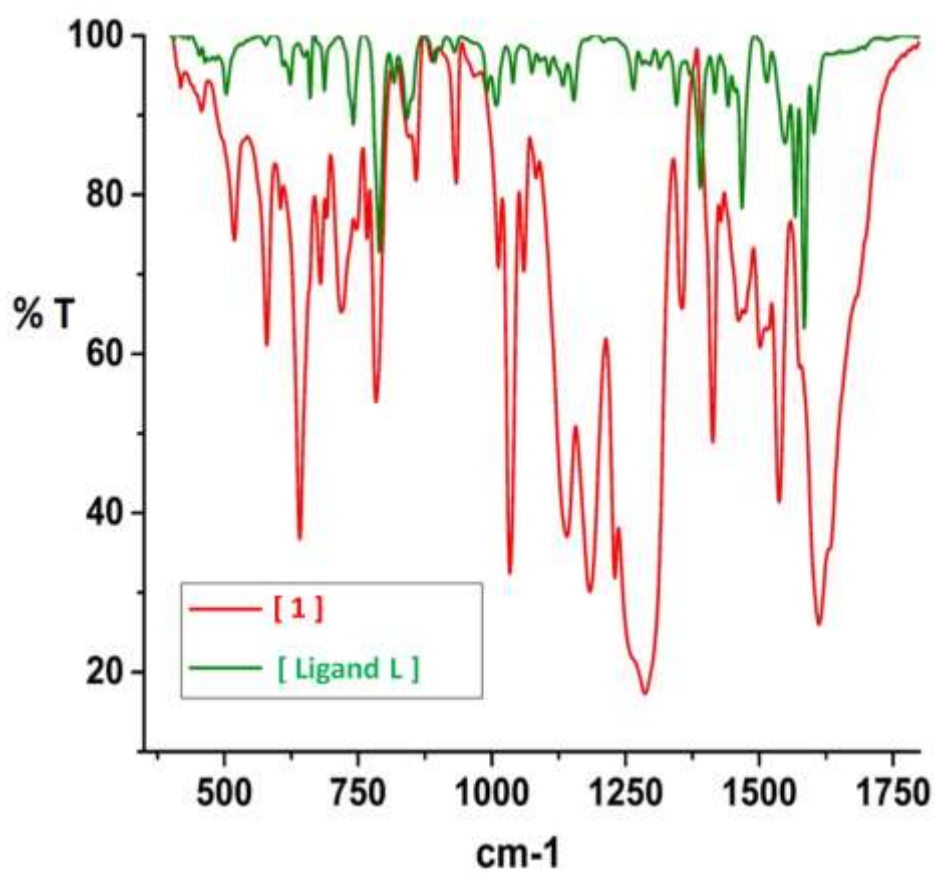

**Figure S4:** FT-IR spectra of Eu<sub>2</sub><sup>III</sup>-bioprope (**1**) and [ $\mu$ -pz(tpy)<sub>2</sub>] (**L**) were recorded in solid-state.

| <b>Table S1:</b> Selected FT-IR frequencies (KBr disc) of <b>1</b> and bridging ligand <b>L</b> |              |                    |
|-------------------------------------------------------------------------------------------------|--------------|--------------------|
| ( $\bar{\nu}$ in cm <sup>-1</sup> )                                                             | [ <b>1</b> ] | [ligand <b>L</b> ] |
| Eu-N                                                                                            | 519          | -                  |
| Eu-O                                                                                            | 457          | -                  |
| C-N                                                                                             | 1183         | 1265               |
| C=N                                                                                             | 1428         | 1584               |
| C=O                                                                                             | 1611         | -                  |
| C-F                                                                                             | 1140         | -                  |

**Table S2.** Selected crystallographic data and structure refinement parameters of  $[\mu\text{-pz}(\text{tpy})_2]$  (**L**) ligand.

| Parameter                                                                                               | $[\mu\text{-pz}(\text{tpy})_2]$ ligand ( <b>L</b> )                 |
|---------------------------------------------------------------------------------------------------------|---------------------------------------------------------------------|
| Empirical formula                                                                                       | C <sub>48</sub> H <sub>40</sub> N <sub>8</sub>                      |
| Formula weight                                                                                          | 728.88                                                              |
| Crystal system                                                                                          | Monoclinic                                                          |
| Space group                                                                                             | <i>P</i> 2 <sub>1</sub> / <i>c</i>                                  |
| <i>a</i> Å                                                                                              | 15.167(8)                                                           |
| <i>b</i> Å                                                                                              | 8.833(5)                                                            |
| <i>c</i> Å                                                                                              | 15.473(10)                                                          |
| $\alpha$ (deg)                                                                                          | 90.00                                                               |
| $\beta$ (deg)                                                                                           | 118.39(3)                                                           |
| $\gamma$ (deg)                                                                                          | 90.00                                                               |
| Volume Å <sup>3</sup>                                                                                   | 1823.6(19)                                                          |
| <i>Z</i>                                                                                                | 2                                                                   |
| <i>D<sub>x</sub></i> (Mg m <sup>-3</sup> )                                                              | 1.327                                                               |
| $\mu$ (mm <sup>-1</sup> )                                                                               | 0.080                                                               |
| <i>F</i> (000)                                                                                          | 768.0                                                               |
| <i>T</i> (K)                                                                                            | 100(2)                                                              |
| $\theta$ range for data collection(deg)                                                                 | 2.766 to 28.874                                                     |
| Limiting indices                                                                                        | -20 ≤ <i>h</i> ≤ 20,<br>-11 ≤ <i>k</i> ≤ 11,<br>-20 ≤ <i>l</i> ≤ 20 |
| Reflections collected                                                                                   | 4511                                                                |
| Unique reflections                                                                                      | 3180                                                                |
| <i>R</i> (int)                                                                                          | 0.0573                                                              |
| <i>T</i> <sub>max</sub> / <i>T</i> <sub>min</sub>                                                       | 0.746/0.690                                                         |
| Data/restraint/parameter                                                                                | 3180/0/253                                                          |
| GOF on <i>F</i> <sup>2</sup>                                                                            | 1.033                                                               |
| <i>R</i> <sub>1</sub> <sup>a</sup> and <i>wR</i> <sub>2</sub> <sup>b</sup> [ <i>I</i> > 2σ( <i>I</i> )] | 0.0552 and 0.1321                                                   |
| <i>R</i> <sub>1</sub> and <i>wR</i> <sub>2</sub> (all data)                                             | 0.0877 and 0.1550                                                   |
| Largest diff. peak and hole (e.Å <sup>-3</sup> )                                                        | 0.33 and -0.29                                                      |
| CCDC deposition number                                                                                  | 2129638                                                             |

<sup>a</sup>  $R_1 = \sum ||F_0| - |F_c|| / \sum |F_0|$ .

<sup>b</sup>  $wR_2 = \{ \sum [w(F_0^2 - F_c^2)] / \sum [w(F_0^2)] \}^{1/2}$

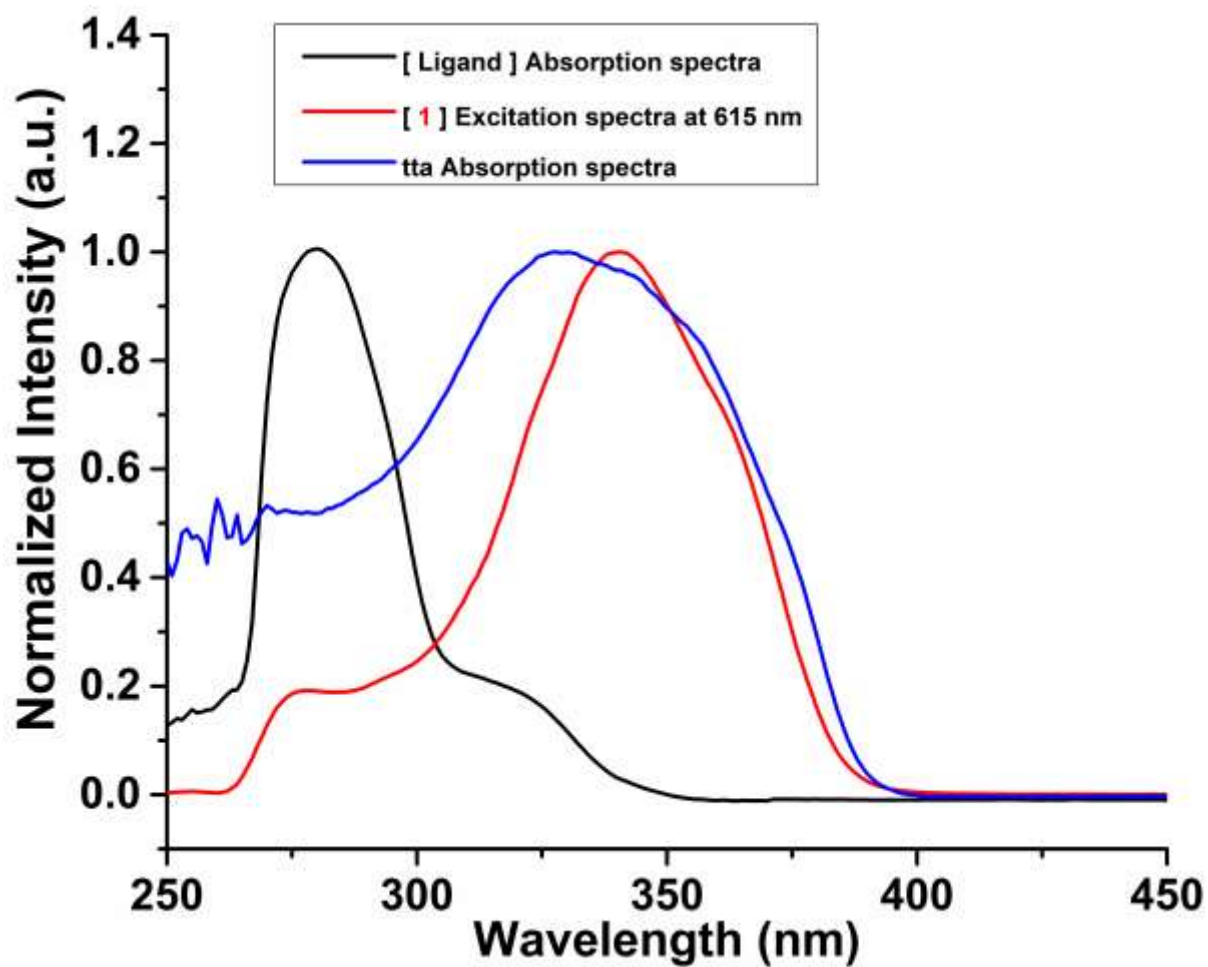

**Figure S5:** Absorption spectra of the bridging ligand L and tta along with the excitation spectra of  $\text{Eu}_2^{\text{III}}$ -bioprobe (**1**) in DMF. ( $T = 298\text{K}$ ,  $[\mathbf{1}] = 4 \mu\text{M}$ ,  $[\text{tta}] = 20 \mu\text{M}$ ,  $[\text{ligand L}] = 20 \mu\text{M}$ . Ex. and Em. slit =  $5 \times 5 \text{ nm}$ )

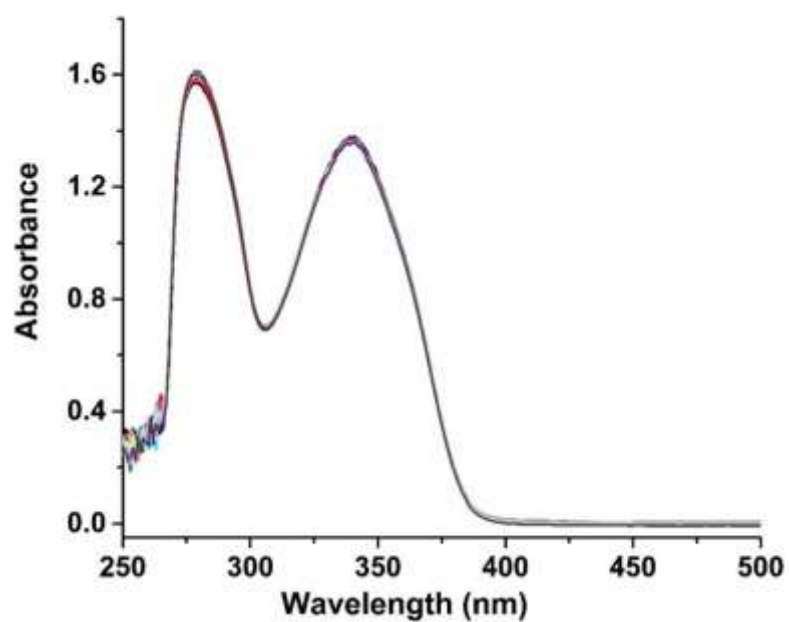

**Figure S6:** Time-dependent variations in absorption spectral of  $\text{Eu}_2^{\text{III}}$ -bioprobe (**1**) in DMF at 298 K for 4 h to access the stability of the respective complex in the solution-state.  $[\mathbf{1}] = 20 \mu\text{M}$ .

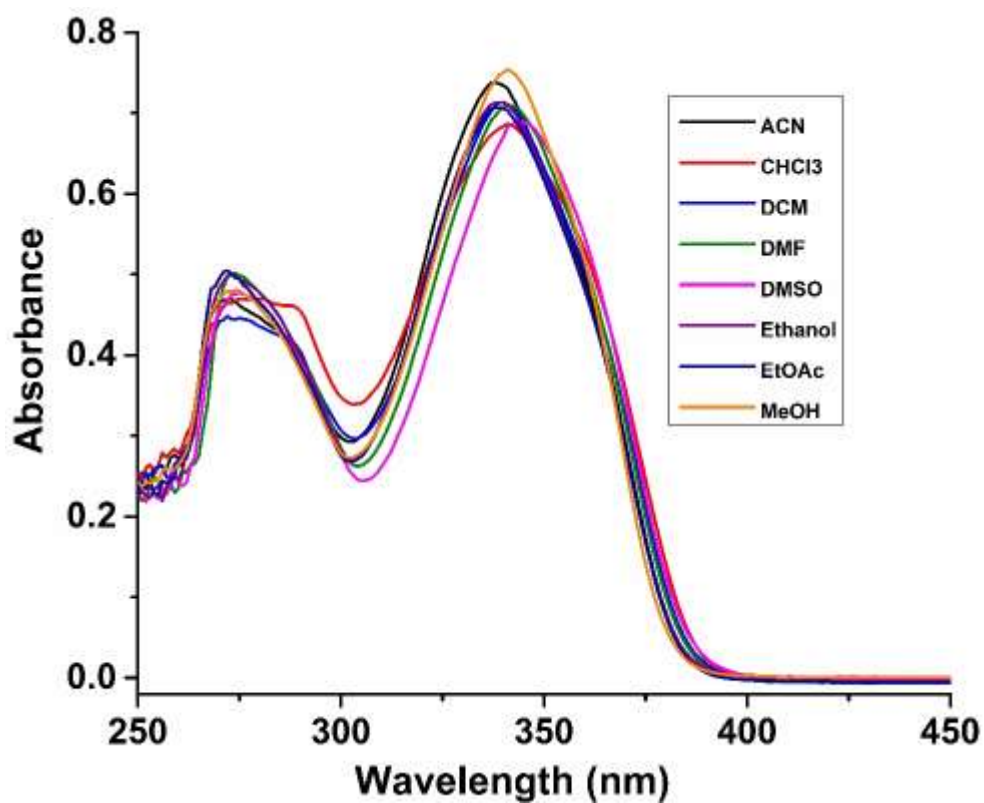

**Figure S7:** Solvent screening of  $\text{Eu}_2^{\text{III}}$ -bioprobe (**1**) in different solvents system using UV-Vis spectral study. ( $T = 298 \text{ K}$ ,  $[\mathbf{1}] = 10 \mu\text{M}$ ).



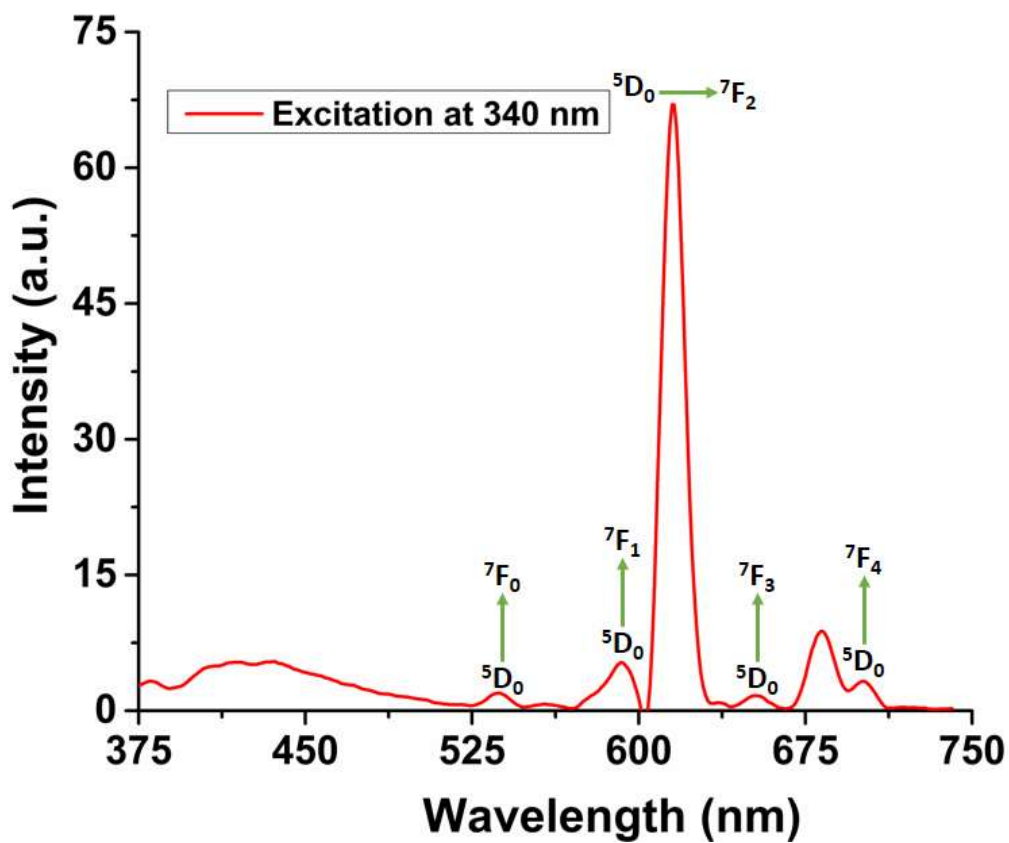

**Figure S8:** Steady state luminescence spectra of Eu<sup>2</sup>III-bioprobe **1** in DMF. (T= 298 K,  $\lambda_{\text{ex}} = 340$  nm,  $[\mathbf{1}] = 4 \mu\text{M}$ , Ex. and Em. slit =  $5 \times 5$  nm).

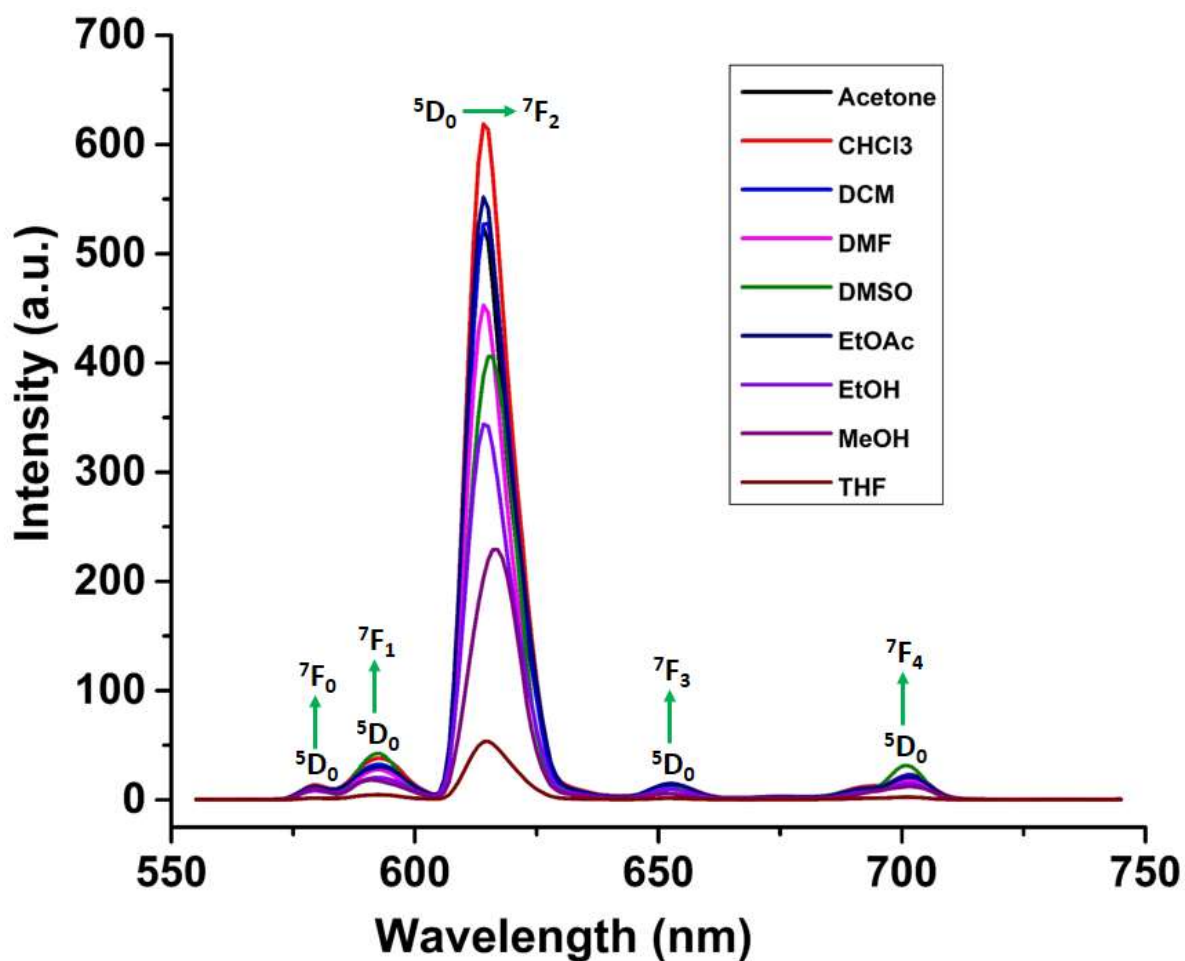

**Figure S9:** Time-resolved luminescence spectral variations of  $\text{Eu}^{2\text{III}}$ -bioprobe (**1**) in the presence of different solvents showing the major changes in the spectral form ( $T = 298 \text{ K}$ ,  $\lambda_{\text{ex}} = 340 \text{ nm}$ ,  $[\mathbf{1}] = 8 \mu\text{M}$ , delay time = 0.2 (ms), and gate time = 0.2 (ms), Ex. and Em. slit=  $2.5 \times 5.0$  respectively).

**Table S3:** Luminescence decay lifetime & rate constant of the complex in respective solvent system ( $T = 298 \text{ K}$ ,  $\lambda_{\text{ex}} = 340 \text{ nm}$ ,  $[\mathbf{1}] = 8 \mu\text{M}$ , delay time = 0.2 (ms), Ex. and Em. slit=  $2.5 \times 2.5$  respectively)

| Parameters              | DMF   | DMSO  | MeOH  | ACN   | $\text{CHCl}_3$ | EtOAc | THF   | Acetone |
|-------------------------|-------|-------|-------|-------|-----------------|-------|-------|---------|
| $\tau(\text{ms})$       | 0.502 | 0.586 | 0.399 | 0.517 | 0.519           | 0.294 | 0.249 | 0.417   |
| $\kappa(\text{s}^{-1})$ | 2.0   | 1.7   | 2.5   | 1.9   | 1.9             | 3.4   | 3.4   | 2.4     |

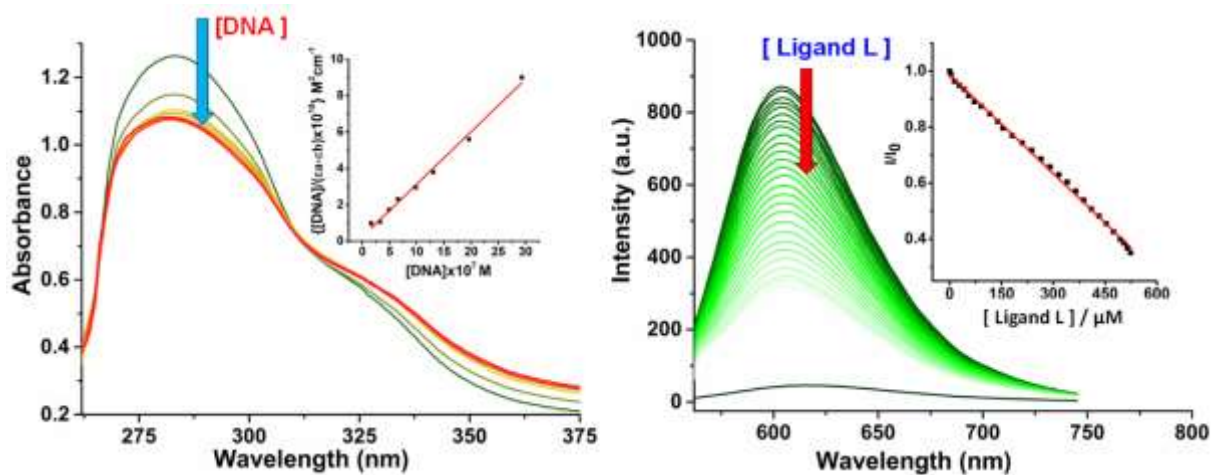

**Figure S10.** (a) Absorption spectral traces of  $[\mu\text{-pz}(\text{tpy})_2]$  (**L**) with gradually increasing of [CT-DNA] in 5.0 mM Tris buffer (pH 7.2). Inset:  $\Delta\lambda_{af}/\Delta\lambda_{bf}$  vs. [DNA] plot for ligand **L** (b) Fluorescence emission spectral traces of EB-bound CT-DNA with increasing concentration of ligand **L** in 5 mM Tris-buffer at  $\lambda_{ex} = 546$  nm,  $\lambda_{em} = 603$  nm, [EB] = 55  $\mu\text{M}$ . Inset: plot shows the relative emission of  $I/I_0$  vs.  $[\mu\text{-pz}(\text{tpy})_2]$  (**L**).

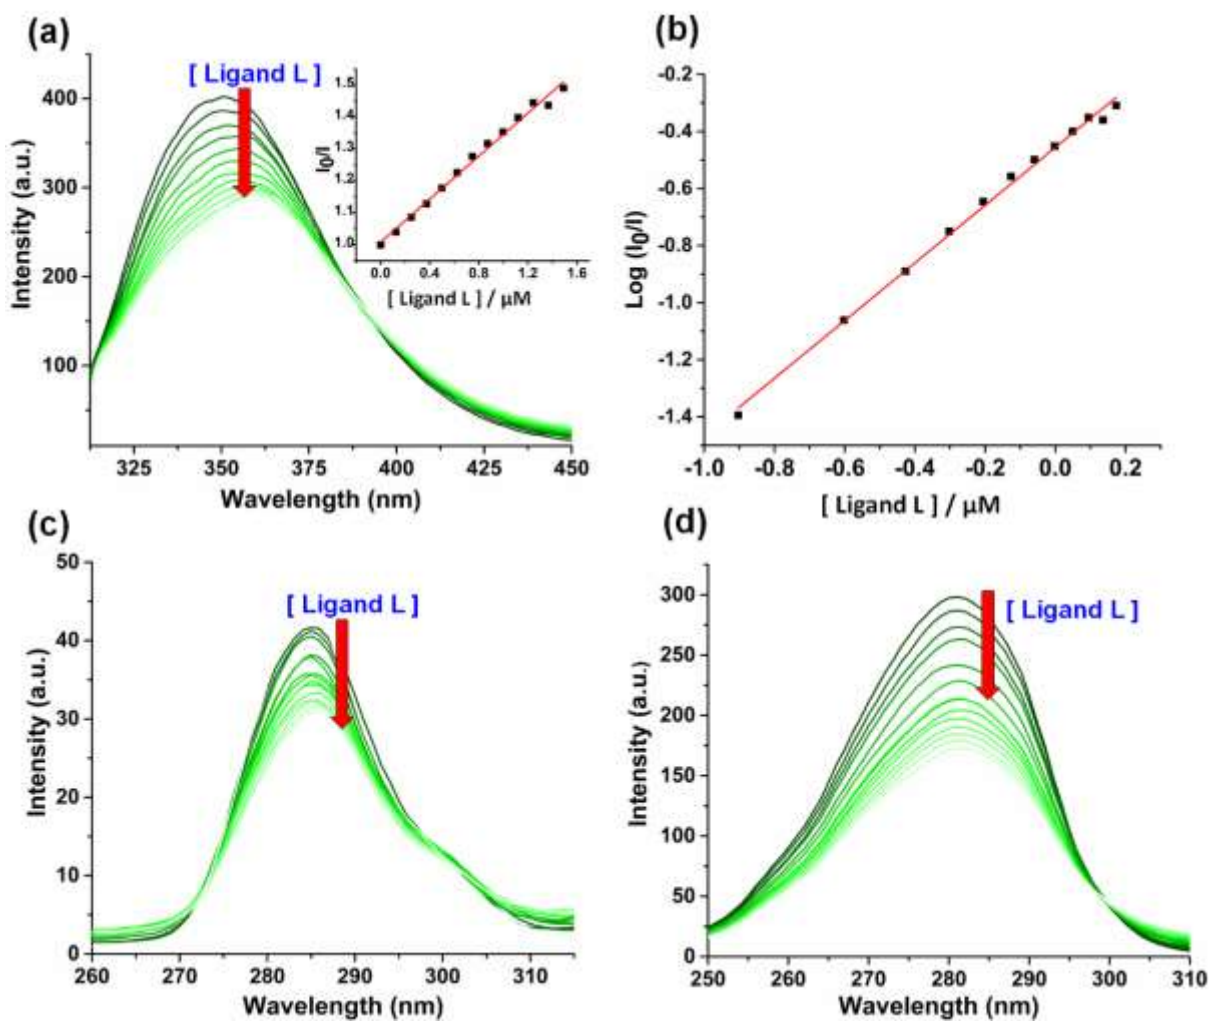

**Figure S11.** (a) The effect of the addition of [ligand L] in BSA solution in 5 mM Tris buffer (pH 7.2) at 298 K. The inset plot the plot of  $I_0/I$  vs. [Ligand L],  $\lambda_{ex} = 295$  nm,  $\lambda_{em} = 345$  nm, [BSA] = 2  $\mu$ M. (b). Modified Stern-Volmer plot of  $\log [(I_0 - I)/I]$  vs.  $\log$  [Ligand L] for determining the binding constant ( $K$ ), quenching rate constant ( $k_q$ ), and the number of binding sites ( $n$ ) for BSA to the [ligand L] interaction. Emission profile of synchronous emission spectra of BSA showing the quenching of emission after gradual addition of [ligand L] (c) with  $\Delta\lambda = 15$  nm and (d) with  $\Delta\lambda = 60$  nm in Tris-HCl buffer (pH 7.2) at 298 K.
